# Supplementary material for: Cationic gemini surfactant as a dual linker for a cholic acid-modified polysaccharide in aqueous solution: thermodynamics of interaction and phase behavior
Source: Royal Society of Chemistry journal article supplement (doi:10.1039/c6cp07212g), 2016-12-05
Supplement: c6cp07212g1.pdf [file c6cp07212g1.pdf]

**Electronic Supplementary Information (ESI) available: calorimetric tracing curves**

**Cationic Gemini Surfactant as a Dual Linker for a Cholic Acid Modified Polysaccharide in Aqueous Solution: Thermodynamics of Interaction and Phase Behavior**

Guangyue Bai,<sup>†\*</sup> Hui Wu,<sup>†</sup> Pengxiao Lou,<sup>†</sup> Yujie Wang,<sup>‡\*</sup> Marieta Nichifor,<sup>§\*</sup> Kelei Zhuo,<sup>†</sup>

Jianji Wang<sup>†</sup> and Margarida Bastos<sup>||\*</sup>

<sup>†</sup>*Collaborative Innovation Center of Henan Province for Green Manufacturing of Fine Chemicals, Key Laboratory of Green Chemical Media and Reactions, Ministry of Education, School of Chemistry and Chemical Engineering, Henan Normal University, Xinxiang, Henan 453007, P. R. China*

<sup>‡</sup>*School of Chemistry and Chemical Engineering, Henan Institute of Science and Technology, Xinxiang, Henan 453003, P. R. China*

<sup>§</sup>*“Petru Poni” Institute of Macromolecular Chemistry, 700487 Iasi, Romania*

<sup>||</sup>*CIQ (UP), Department of Chemistry and Biochemistry, Faculty of Sciences, University of Porto, R. Campo Alegre, 687, P-4169-007 Porto, Portugal*

\*E-mails: [baiguangyue@htu.cn](mailto:baiguangyue@htu.cn) (G. Bai); [yujiewang2001@163.com](mailto:yujiewang2001@163.com) (Y. Wang); [marieta2ro@yahoo.com](mailto:marieta2ro@yahoo.com) (M. Nichifor); [mbastos@fc.up.pt](mailto:mbastos@fc.up.pt) (M. Bastos).

**I. The ITC tracing curve for titration of Dex-15CACOONa (1.0 (w/v)%) into water**

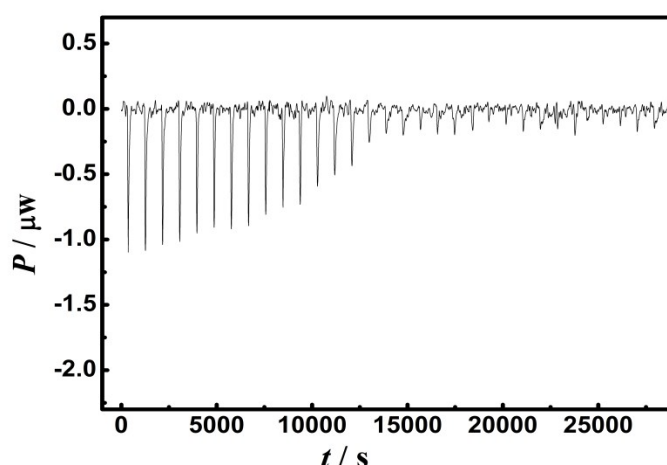

**Fig. S1** The obtained calorimetric tracing for the dilution of the polyelectrolyte, Dex-15CACOONa (1.0 (w/v)%), into water at 298.15K.

## II. The ITC tracing curves for gemini surfactant $C_{12}C_6C_{12}Br_2$ into Dex-15CACOONa solution.

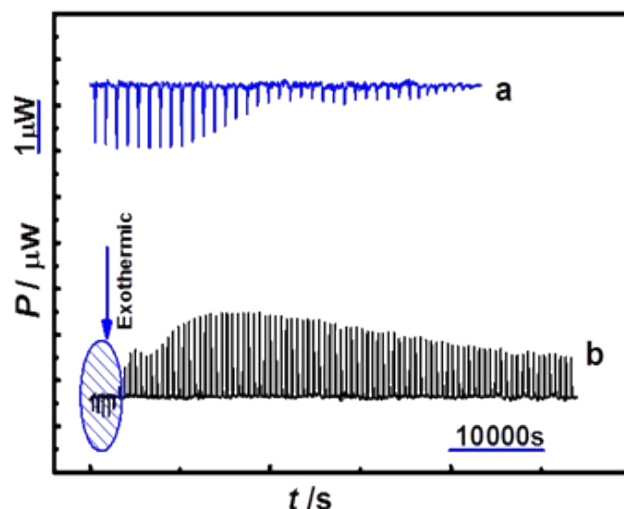

**Fig. S2** Typical ITC curves for the titration of  $C_{12}C_6C_{12}Br_2$  solution into Dex-15CACOONa solution (in the cell) at 298.15 K. The initial concentration of polymer side group in the cell ( $C_{sg}$ ) is  $4.72 \text{ mmol} \cdot \text{dm}^{-3}$ ; the concentrations of  $C_{12}C_6C_{12}Br_2$  ( $C_{gemini}$ ) in the syringe are (a)  $2.5 \text{ mmol} \cdot \text{dm}^{-3}$  and (b)  $10.0 \text{ mmol} \cdot \text{dm}^{-3}$ .

**Notes:** The titration performed with lower concentration ( $2.5 \text{ mmol} \cdot \text{dm}^{-3}$ ) of  $C_{12}C_6C_{12}Br_2$  into Dex-15CACOONa produces an exothermic effect, that starts decreasing steeply (in absolute value) at the eighth injection until a plateau at a small exothermic value for some injections, and decreasing again to an almost zero heat effect thereafter (curve (a)). When a higher  $C_{12}C_6C_{12}Br_2$  concentration was used ( $10.0 \text{ mmol} \cdot \text{dm}^{-3}$ ) there is a change from an exothermic effect at the beginning of the titration (the first five injections) to an endothermic effect for the remaining titration (curve (b)). The energetic information we can extract about the interaction is critical for an explanation of the phase behavior and the change in aggregate morphologies.
